# Supplementary material
Source: PubMed Central journal article supplement (PMC9213609)

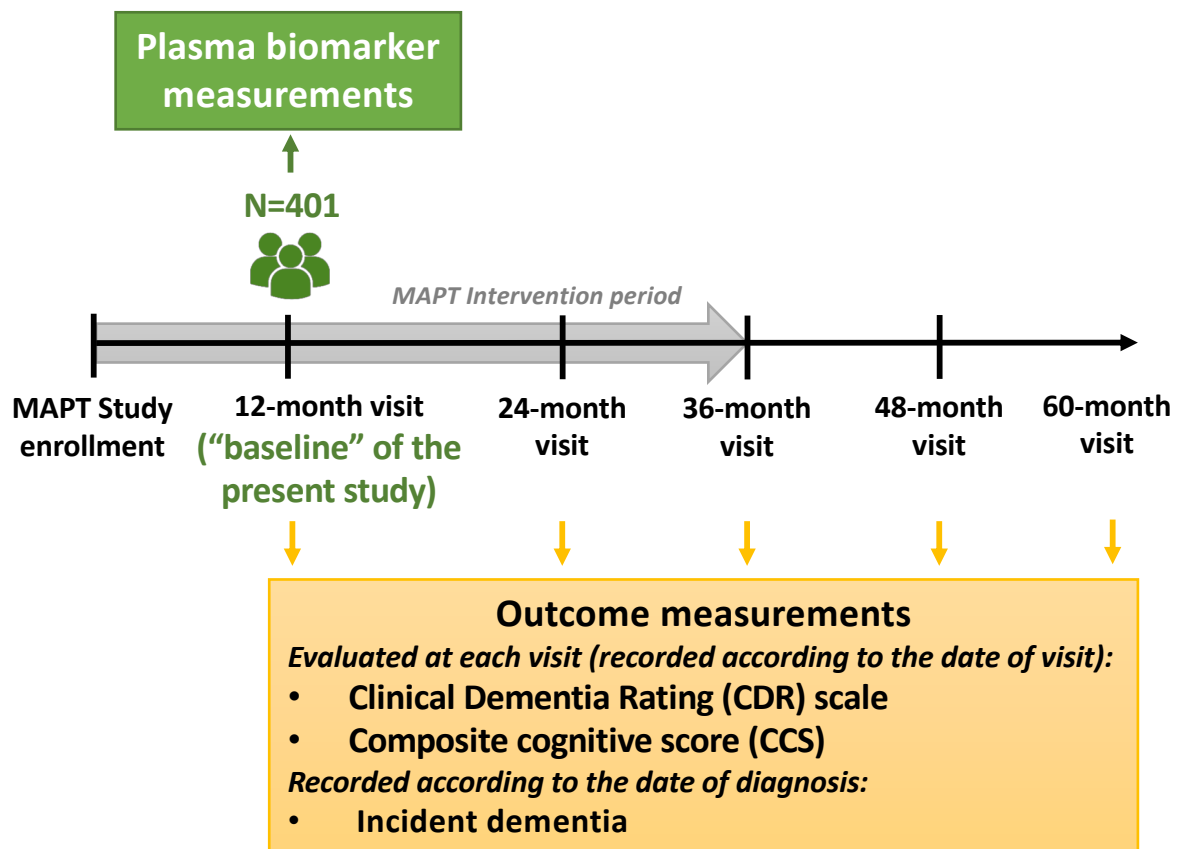

**Supplementary Figure 1.** Timeline of plasma biomarkers and cognitive outcome measurements

Supplement: 11357_2022_554_MOESM2_ESM.pdf [file 11357_2022_554_MOESM2_ESM.pdf]
